# Supplementary material for: Potassium doping towards enhanced Na-ion diffusivity in a fluorophosphate cathode for sodium-ion full cells
Source: Royal Society of Chemistry journal article supplement (doi:10.1039/d2ta05593g), 2022-01-01
Supplement: d2ta05593g1.pdf [file d2ta05593g1.pdf]

## Supplementary File

### **Potassium doping towards enhanced Na-ion diffusivity in fluorophosphate cathode for sodium-ion full cell**

Hong Yu,<sup>a</sup> Yan Gao,<sup>a</sup> Jinjin Wang,<sup>a</sup> Qinghua Liang,<sup>b</sup> Jinzhao Kang,<sup>a</sup> Xiaomei Wang,<sup>a</sup> Cheng-Feng Du<sup>\*a</sup>  
and Qingyu Yan<sup>c</sup>

- a. State Key Laboratory of Solidification Processing, Center of Advanced Lubrication and Seal Materials, Northwestern Polytechnical University, Xi'an, Shaanxi 710072, P. R. China.
- b. Department of Chemical Engineering, The University of Melbourne, Victoria 3010, Australia.
- c. School of Materials Science and Engineering, Nanyang Technological University, 50 Nanyang Avenue, 639798, Singapore.

\* Corresponding Author, E-mail: cfdu@nwpu.edu.cn

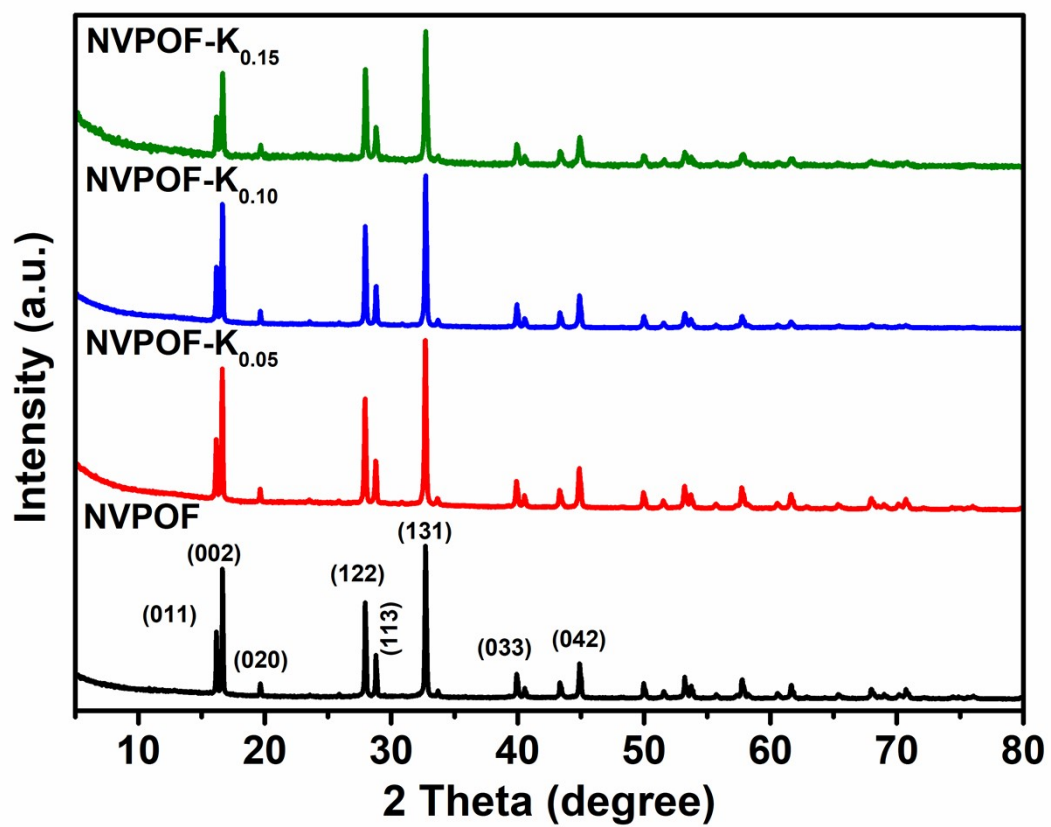

**Fig. S1** XRD patterns of NVPOF, NVPOF-K<sub>0.05</sub>, NVPOF-K<sub>0.10</sub> and NVPOF-K<sub>0.15</sub> samples.

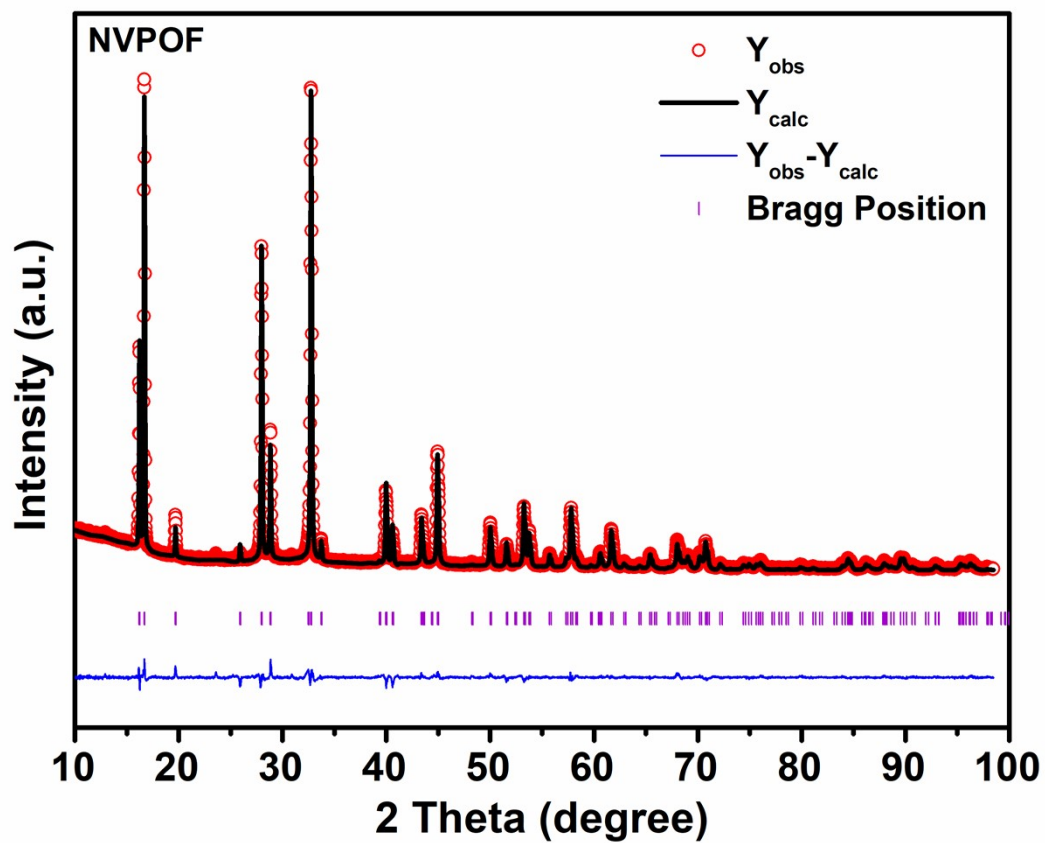

Fig. S2 XRD pattern and Rietveld refinement plot for NVPOF material.

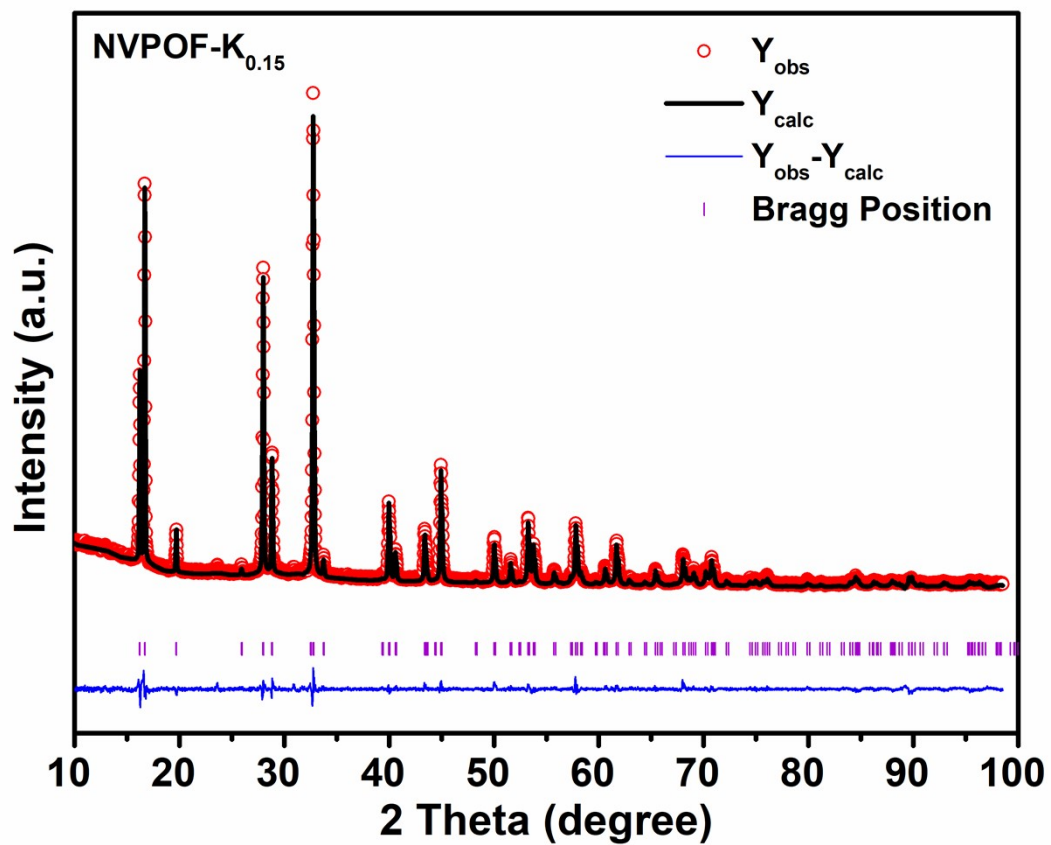

Fig. S3 XRD pattern and Rietveld refinement plot for NVPOF-K<sub>0.15</sub> material.

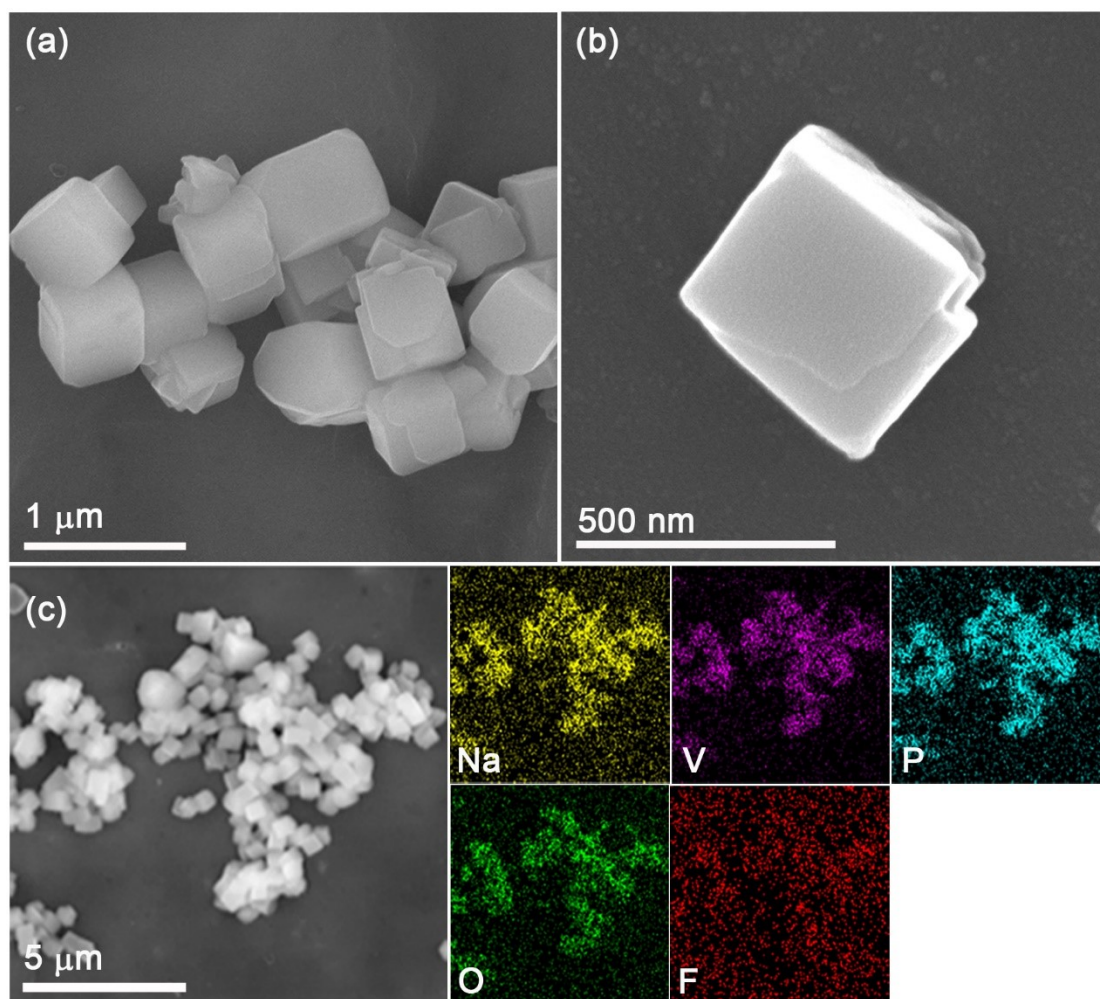

**Fig. S4** FESEM images and corresponding EDX elemental mapping of NVPOF material.

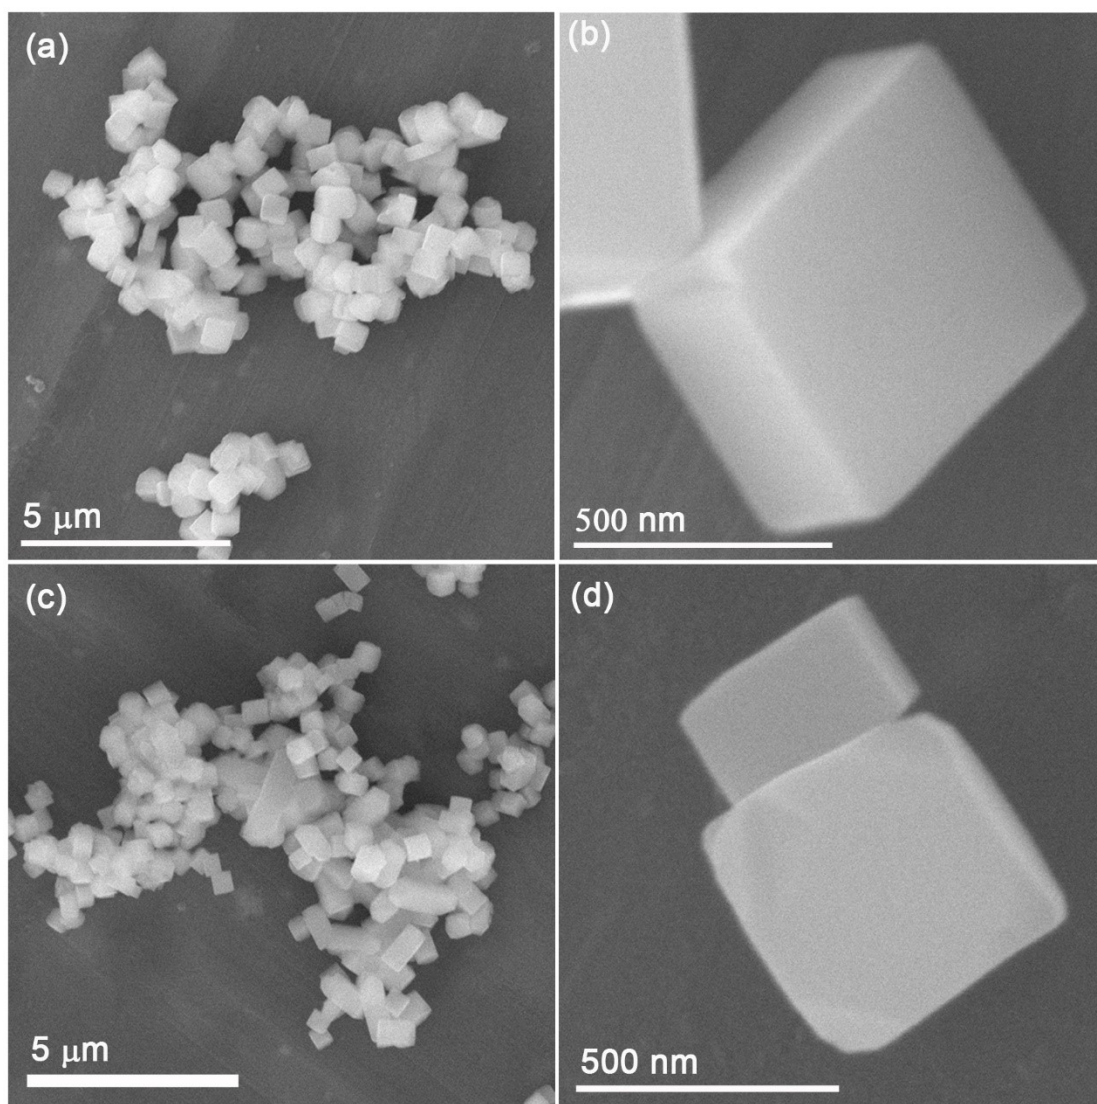

**Fig. S5** (a) and (b) FESEM images of NVPOF-K<sub>0.10</sub> and (c) and (d) FESEM images of NVPOF-K<sub>0.15</sub>.

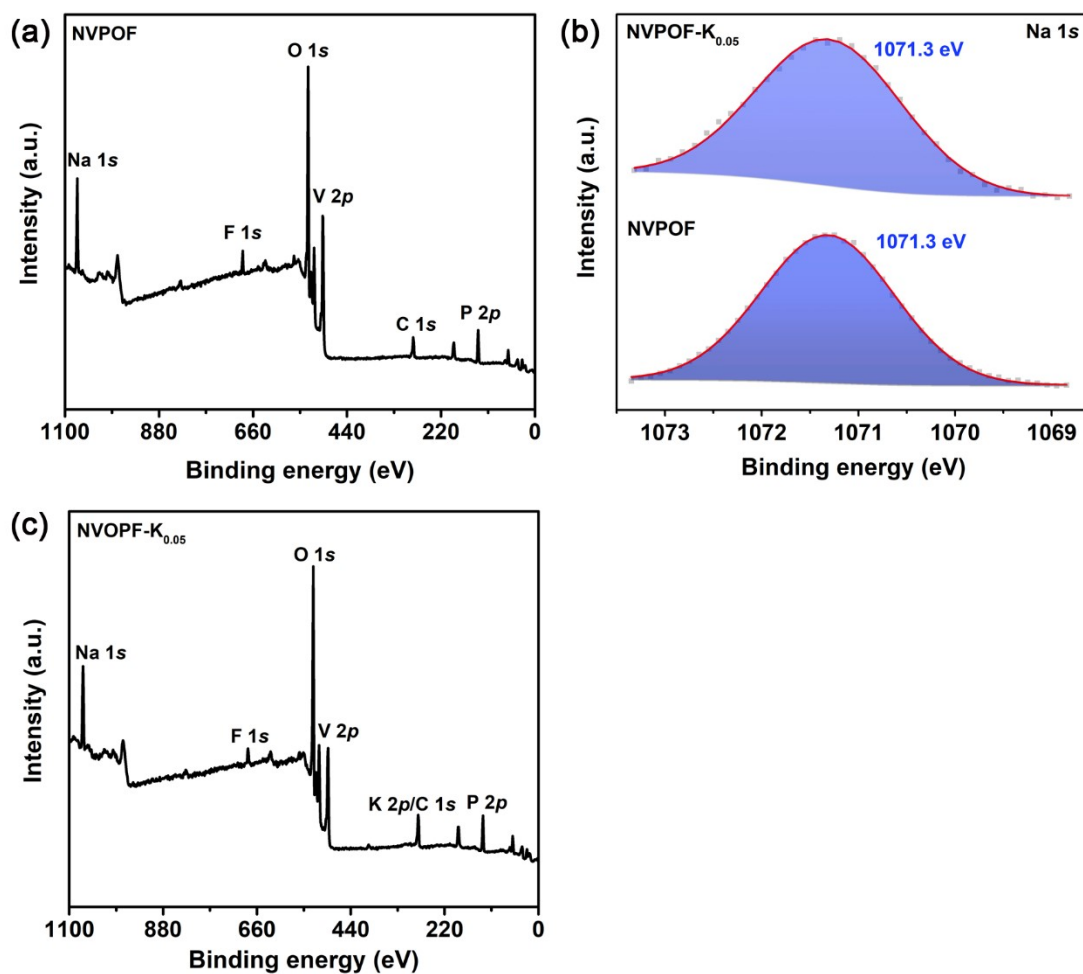

**Fig. S6** XPS results of NVPOF and NVPOF-K<sub>0.05</sub>. Survey of (a) NVPOF and (c) NVPOF-K<sub>0.05</sub>; (b) Na 1s of NVPOF and NVPOF-K<sub>0.05</sub>.



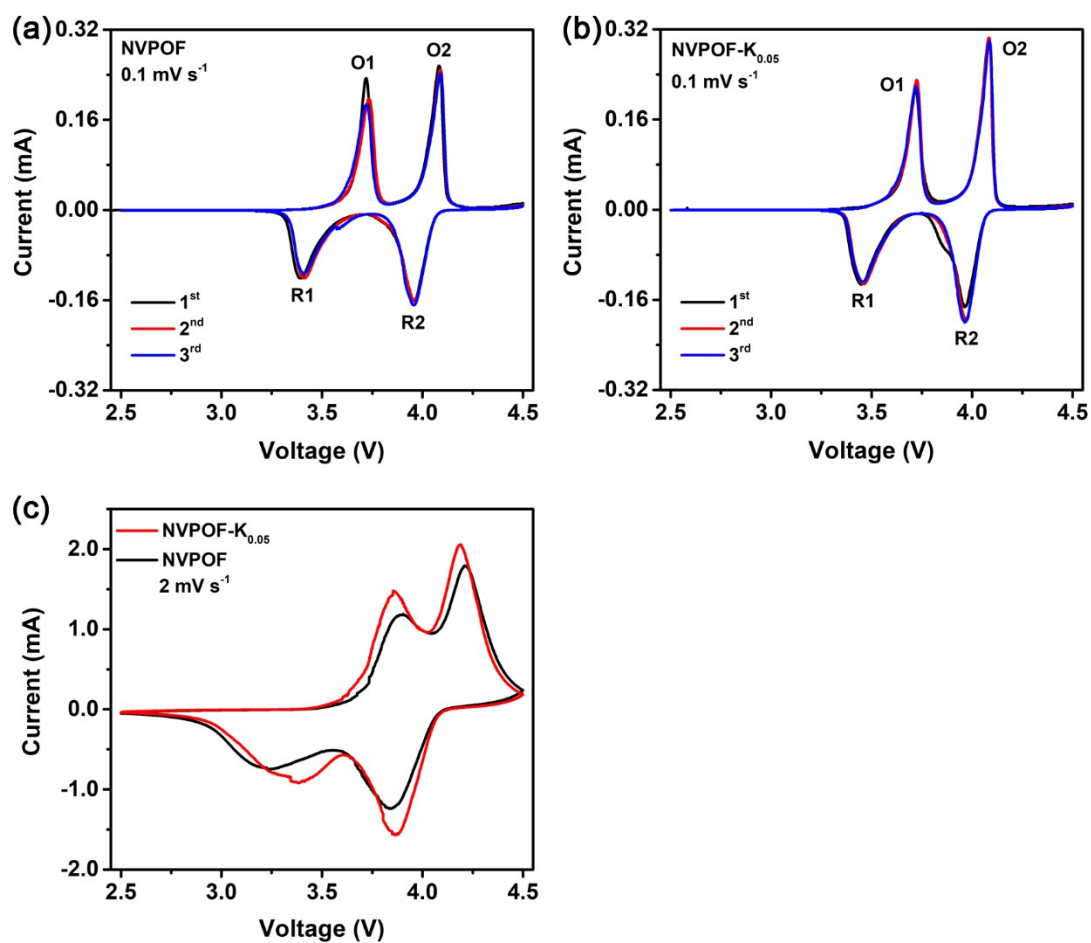

**Fig. S7** First three CV curves at 0.1 mV s<sup>-1</sup> of (a) NVPOF and (b) NVPOF-K<sub>0.05</sub>. (c) Comparison of CV curve at 2 mV s<sup>-1</sup> of NVPOF and NVPOF-K<sub>0.05</sub>.

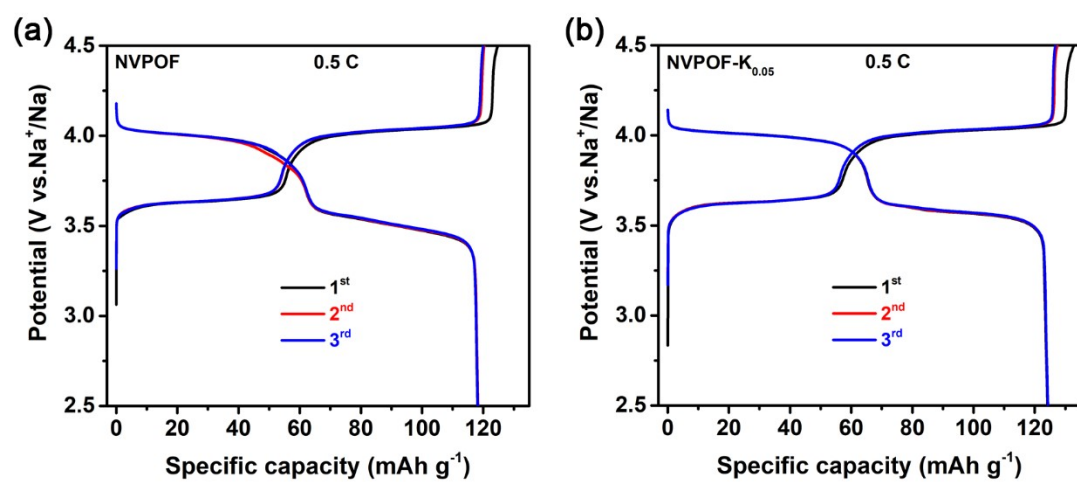

**Fig. S8** The first three GCD curves of (a) NVPOF and (b) NVPOF-K<sub>0.05</sub> cathodes at a current density of 0.5 C.



**Table S1** Chemical compositions of NVPOF and NVPOF-K<sub>0.05</sub> determined by ICP-OES

| Sample                  | Molar ratio of Na: V: (K) |               |               |
|-------------------------|---------------------------|---------------|---------------|
|                         | ICP-OES                   | ICP-OES (Na)  | ICP-OES (V)   |
| NVPOF                   | 2.960:1.876               | 1:0.634       | 1.578: 1      |
| NVPOF-K <sub>0.05</sub> | 3.358:2.151:0.018         | 1:0.640:0.005 | 1.561:1:0.008 |

**Table S2** Anodic and cathodic peak potentials of NVPOF and NVPOF-K<sub>0.05</sub> cathodes at different scan rates.

| Sample                  | Scan rate/<br>mV s <sup>-1</sup> | Anodic peak |       | Cathodic peak |       | Polarization |            |
|-------------------------|----------------------------------|-------------|-------|---------------|-------|--------------|------------|
|                         |                                  | O1/V        | O2/V  | R1/V          | R2/V  | (O1-R1)/mV   | (O2-R2)/mV |
| NVPOF                   | 0.1                              | 3.720       | 4.088 | 3.408         | 3.958 | 312          | 130        |
|                         | 2.0                              | 3.903       | 4.211 | 3.229         | 3.836 | 674          | 375        |
| NVPOF-K <sub>0.05</sub> | 0.1                              | 3.719       | 4.085 | 3.461         | 3.965 | 258          | 120        |
|                         | 2.0                              | 3.855       | 4.185 | 3.383         | 3.869 | 472          | 316        |

**Table S3** A comparison of electrochemical performance of the NVPOF-K<sub>0.05</sub> cathode this work with the reported cathodes.

| Cathode materials                                                                                   | Rate capability                 | Cycle stability              |            | Ref |
|-----------------------------------------------------------------------------------------------------|---------------------------------|------------------------------|------------|-----|
|                                                                                                     |                                 | (C rate/cycle times/capacity | retention) |     |
| NVPOF-MWCNT                                                                                         | ~60 mAh g <sup>-1</sup> @20 C   | 0.1 C/120/89%                |            | [1] |
| NVPOF@C/G                                                                                           | 78.2 mAh g <sup>-1</sup> @20 C  | 2 C/200/92.9%                |            | [2] |
| Na <sub>2.94</sub> Li <sub>0.06</sub> V <sub>2</sub> (PO <sub>4</sub> ) <sub>2</sub> F <sub>3</sub> | 65 mAh g <sup>-1</sup> @20 C    | --                           |            | [3] |
| NKVPF@CNT                                                                                           | 50 mAh g <sup>-1</sup> @50 C    | 10 C/1600/90.9%              |            | [4] |
| NVPOF-K <sub>0.05</sub> (this work)                                                                 | 49.11 mAh g <sup>-1</sup> @80 C | 10 C/500/100%                |            | --  |

**Table S4** Resistances and apparent diffusion coefficients calculated from the EIS of NVPOF and NVPOF-K<sub>0.05</sub> cathode.

| Sample                  | R <sub>s</sub> /Ω | R <sub>ct</sub> /Ω | σ <sub>w</sub> /Ω | D/cm <sup>2</sup> s <sup>-1</sup> |
|-------------------------|-------------------|--------------------|-------------------|-----------------------------------|
| NVPOF                   | 7.14              | 273                | 3724.52           | 2.07·10 <sup>-15</sup>            |
| NVPOF-K <sub>0.05</sub> | 5.31              | 310                | 1800.00           | 8.85·10 <sup>-15</sup>            |

## Reference

- [1] Kumar P R, Jung Y H, Wang J E, et al.  $\text{Na}_3\text{V}_2\text{O}_2(\text{PO}_4)_2\text{F}$ -MWCNT nanocomposites as a stable and high rate cathode for aqueous and non-aqueous sodium-ion batteries. *Journal of Power Sources*, 2016, 324, 421-427.
- [2] Jin H, Liu M, Uchaker E, et al. Nanoporous carbon leading to the high performance of a  $\text{Na}_3\text{V}_2\text{O}_2(\text{PO}_4)_2\text{F}$ @carbon/graphene cathode in a sodium ion battery. *CrystEngComm*, 2017, 19(30), 4287-4293.
- [3] Kosova N V, Rezepova D O. Mixed sodium-lithium vanadium fluorophosphates  $\text{Na}_{3-x}\text{Li}_x\text{V}_2(\text{PO}_4)_2\text{F}_3$ : The origin of the excellent high-rate performance. *Journal of Power Sources*, 2018, 408, 120-127.w
- [4] Li L, Liu X, Tang L, et al. Improved electrochemical performance of high voltage cathode  $\text{Na}_3\text{V}_2(\text{PO}_4)_2\text{F}_3$  for Na-ion batteries through potassium doping. *Journal of Alloys and Compounds*, 2019, 790, 203-211.
